# Supplementary material
Source: ML conference proceedings conference paper supplement (https://proceedings.mlr.press/v37/winner15.html)
Supplement: Supplementary file [file winner15-supp.pdf]

---

## Supplementary Material:

# Inference in a Partially Observed Queuing Model with Applications in Ecology

---

Kevin Winner<sup>1</sup>  
 Garrett Bernstein<sup>1</sup>  
 Daniel Sheldon<sup>1,2</sup>

KWINNER@CS.UMASS.EDU  
 GBERNSTEIN@CS.UMASS.EDU  
 SHELDON@CS.UMASS.EDU

<sup>1</sup>College of Information and Computer Sciences, University of Massachusetts, Amherst, MA 01002, USA

<sup>2</sup>Department of Computer Science, Mount Holyoke College, South Hadley, MA 01075, USA

### 1. Proof of Log-Concavity

Proof of Theorem 2.

*Proof.* We can factor the pmf of  $\delta$  as follows:

$$\begin{aligned}
 p(\delta) &= a(\delta)b(\delta) \prod_{n_k \in n^+} c_k(\delta)e(\delta) \prod_{n_l \in n^-} d_l(\delta)e(\delta)^{-1} \\
 a(\delta) &= \prod_{p_i \in p^+, q_i \in q^+} \frac{p_i^{q_i + \delta}}{(q_i + \delta)!} \\
 b(\delta) &= \prod_{p_j \in p^-, q_j \in q^-} \frac{p_j^{q_j - \delta}}{(q_j - \delta)!} \\
 c_k(\delta) &= \frac{(n_k + \delta)!}{(n_k + \delta - y_k)!} \\
 d_l(\delta) &= \frac{(n_l - \delta)!}{(n_l - \delta - y_l)!} \\
 e(\delta) &= (1 - \alpha)^\delta
 \end{aligned}$$

Where  $\{p^+, q^+, n^+\}$  and  $\{p^-, q^-, n^-\}$  represent the subsets of  $\mathbf{p}$ ,  $\mathbf{q}$ , and  $\mathbf{n}$  which change positively and negatively under  $\mathbf{z}$  accordingly. Since the product of log concave functions is also log concave, it is thus sufficient to demonstrate that each of the factors of  $\mathcal{L}(\delta)$  is log concave. Observe that the inner part of  $a(\delta)$  is the form of  $e^\lambda \text{Poisson}_\lambda(k)$  where  $\lambda = p_i$  and  $k = q_i + \delta$ . Since the Poisson is log concave and so is  $e^\lambda$ ,  $a(\delta)$  is also log concave in  $\delta$ . By an identical argument, so is  $b(\delta)$ .

For  $e(\delta)$ , note that  $\log(1 - \alpha)^\delta = \delta \log(1 - \alpha)$ , which is linear in  $\delta$  and therefore  $e(\delta)$  is log concave in  $\delta$ , as is  $e(\delta)^{-1}$ .

The proof of concavity for  $c_k(\delta)$  and  $d_l(\delta)$  is below:

$$c_k(\delta) = \frac{(n_k + \delta)!}{(n_k + \delta - y_k)!}$$

Let  $n' = n_k + \delta$

$$c_k(n') = \frac{n'!}{(n' - y_k)!}$$

by construction,  $n' = n_k + \delta \geq y_k$

to show  $c_k(n')$  is log concave, we must show:

$$\begin{aligned}
 c_k(n')^2 &\geq c_k(n' - 1)c_k(n' + 1) \\
 \frac{c_k(n')}{c_k(n' + 1)} &\geq \frac{c_k(n' - 1)}{c_k(n')} \\
 \frac{n'!}{(n' - y_k)!} \frac{(n' + 1 - y_k)!}{(n' + 1)!} &\geq \frac{(n' - 1)!}{(n' - 1 - y_k)!} \frac{(n' - y_k)!}{n'!} \\
 \frac{n' + 1 - y_k}{n' + 1} &\geq \frac{n' - y_k}{n'} \\
 1 - \frac{y_k}{n' + 1} &\geq 1 - \frac{y_k}{n'}
 \end{aligned}$$

Thus  $c_k(n')$  and, by extension,  $c_k(\delta)$  are log concave. A similar argument shows that  $d_l(\delta)$  is log concave as well. Then we have shown that  $p(\delta)$  is a product of log concave functions and therefore  $p(\delta)$  is also log concave.  $\square$
